# Supplementary material
Source: ML conference proceedings conference paper supplement (https://openreview.net/forum?id=A9LCIRxXP9)

CTIS (mean  $\pm$  std)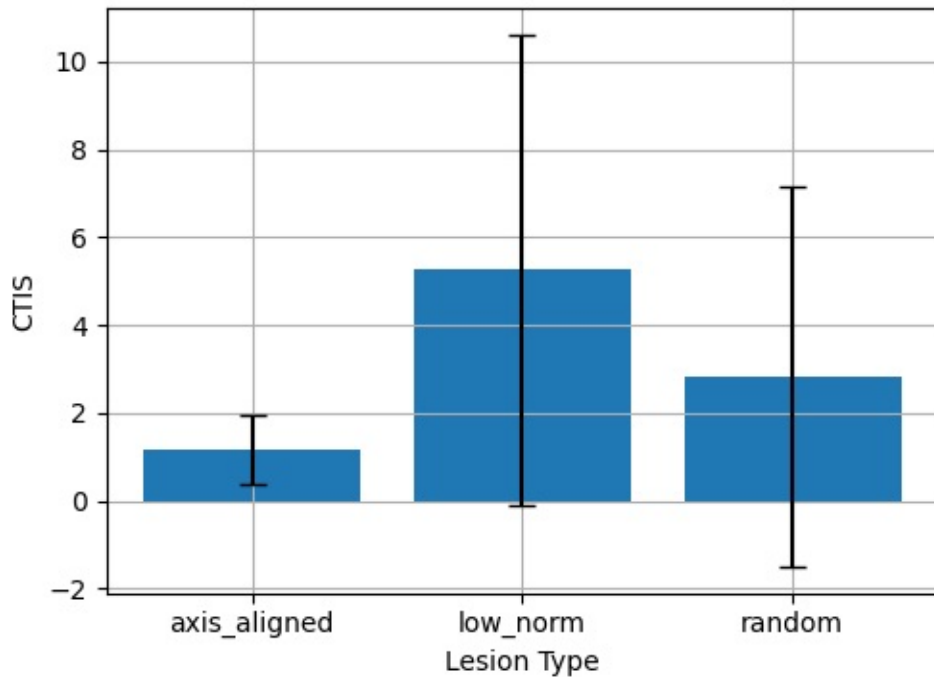 $\Delta$ Betti<sub>2</sub> (mean  $\pm$  std)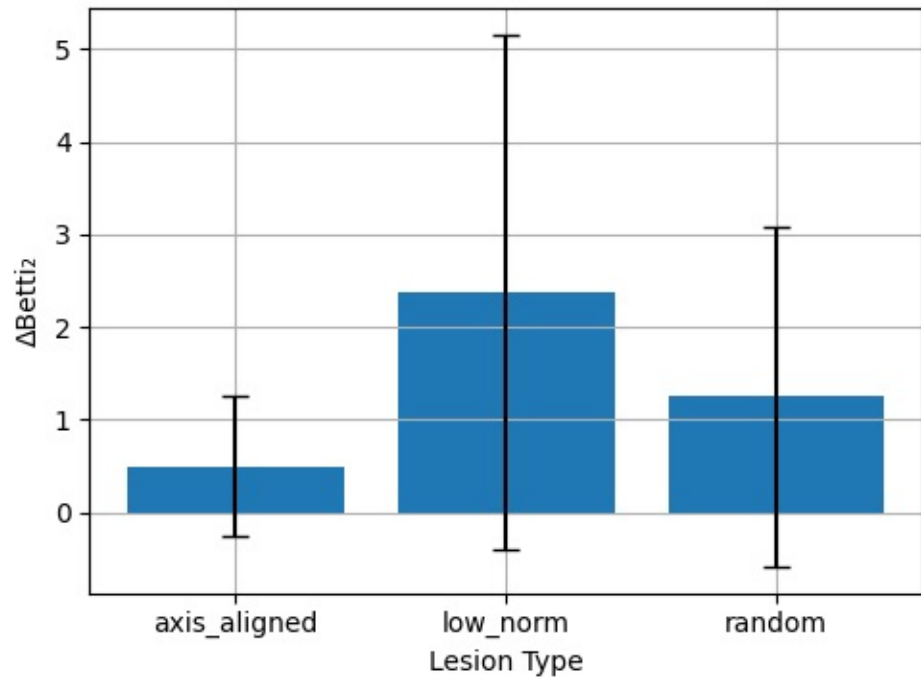

Supplement: supplementary_material [file ctis_deltaB2_summary_all_sessions.pdf › supplementary_material/ctis_master_results_0512/ctis_deltaB2_summary_all_sessions.pdf]
